# Supplementary material for: De novoassembly ofSchizothorax waltonitranscriptome to identify immune-related genes and microsatellite markers
Source: Royal Society of Chemistry journal article supplement (doi:10.1039/c8ra00619a), 2018-01-01
Supplement: c8ra00619a1.pdf [file c8ra00619a1.pdf]

**Supplementary files:**

***De novo* assembly of *Schizothorax waltoni* transcriptome to identify  
immune-related genes and microsatellite markers**

Hua Ye<sup>a,b</sup>, Zhengshi Zhang<sup>a,b</sup>, Chaowei Zhou<sup>a,b</sup>, Chengke Zhu<sup>a,b</sup>, Yuejing Yang<sup>a,b</sup>,  
Mengbin Xiang<sup>a,b</sup>, Xinghua Zhou<sup>a,b</sup>, Jian Zhou<sup>c\*</sup>, Hui Luo<sup>a,b\*</sup>

a. College of Animal Science, Southwest University, Chongqing 402460, China

b. Key Laboratory of Freshwater Fish Reproduction and Development (Ministry of Education), Key Laboratory of Aquatic Science of Chongqing 400175, China

c. Fisheries Research Institute, Sichuan Academy of Agricultural Sciences, Chengdu, 611731, China

\* Corresponding author

J. Zhou, e-mail: zhoujian980@126.com; H. Luo, e-mail: luohui2629@126.com

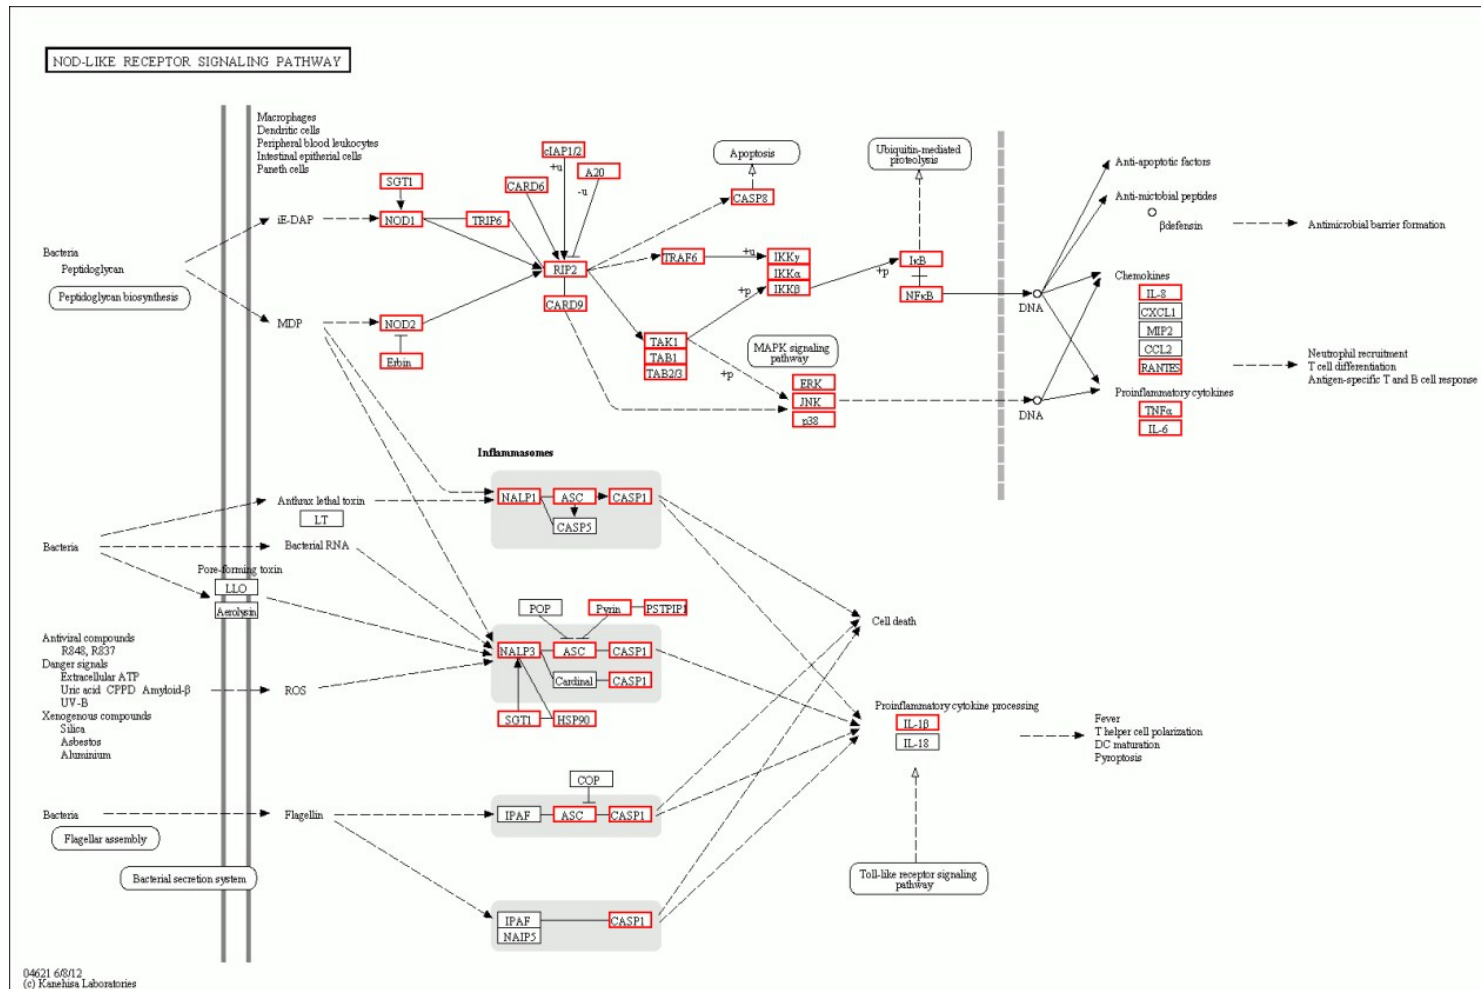

**Figure S1: NOD-like receptor signaling pathway showing the annotated and non-annotated proteins. Proteins appearing in *Schizothorax waltoni*'s transcriptome are represented in red boxes and absent proteins in white boxes.**



**Supplementary table S1:** COG functional classification of putative protein for *Schizothorax waltoni* transcriptome.

| Code | Functional-Categories                                         | Gene-Number | All-Number | Percent |
|------|---------------------------------------------------------------|-------------|------------|---------|
| A    | RNA processing and modification                               | 81          | 11334      | 0.7     |
| B    | Chromatin structure and dynamics                              | 375         | 11334      | 3.3     |
| C    | Energy production and conversion                              | 536         | 11334      | 4.7     |
| D    | Cell cycle control, cell division, chromosome partitioning    | 1538        | 11334      | 13.6    |
| E    | Amino acid transport and metabolism                           | 723         | 11334      | 6.4     |
| F    | Nucleotide transport and metabolism                           | 240         | 11334      | 2.1     |
| G    | Carbohydrate transport and metabolism                         | 1460        | 11334      | 12.9    |
| H    | Coenzyme transport and metabolism                             | 415         | 11334      | 3.7     |
| I    | Lipid transport and metabolism                                | 461         | 11334      | 4.1     |
| J    | Translation, ribosomal structure and biogenesis               | 1891        | 11334      | 16.7    |
| K    | Transcription                                                 | 2127        | 11334      | 18.8    |
| L    | Replication, recombination and repair                         | 2170        | 11334      | 19.1    |
| M    | Cell wall/membrane/envelope biogenesis                        | 1317        | 11334      | 11.6    |
| N    | Cell motility                                                 | 380         | 11334      | 3.4     |
| O    | Posttranslational modification, protein turnover, chaperones  | 1876        | 11334      | 16.6    |
| P    | Inorganic ion transport and metabolism                        | 887         | 11334      | 7.8     |
| Q    | Secondary metabolites biosynthesis, transport and catabolism  | 579         | 11334      | 5.1     |
| R    | General function prediction only                              | 4899        | 11334      | 43.2    |
| S    | Function unknown                                              | 1494        | 11334      | 13.2    |
| T    | Signal transduction mechanisms                                | 1553        | 11334      | 13.7    |
| U    | Intracellular trafficking, secretion, and vesicular transport | 860         | 11334      | 7.6     |

|   |                          |     |       |     |
|---|--------------------------|-----|-------|-----|
| V | Defense mechanisms       | 106 | 11334 | 0.9 |
| W | Extracellular structures | 19  | 11334 | 0.2 |
| Y | Nuclear structure        | 8   | 11334 | 0.1 |
| Z | Cytoskeleton             | 859 | 11334 | 7.6 |

**Supplementary table S2:** Detailed annotation information for KEGG pathways.

| #Pathway                                            | Count | Pathway ID | Level 1    | Level 2                                     |
|-----------------------------------------------------|-------|------------|------------|---------------------------------------------|
| Lysine degradation                                  | 252   | ko00310    | Metabolism | Amino acid metabolism                       |
| Arginine and proline metabolism                     | 146   | ko00330    | Metabolism | Amino acid metabolism                       |
| Valine, leucine and isoleucine degradation          | 134   | ko00280    | Metabolism | Amino acid metabolism                       |
| Glycine, serine and threonine metabolism            | 108   | ko00260    | Metabolism | Amino acid metabolism                       |
| Cysteine and methionine metabolism                  | 105   | ko00270    | Metabolism | Amino acid metabolism                       |
| Tryptophan metabolism                               | 88    | ko00380    | Metabolism | Amino acid metabolism                       |
| Alanine, aspartate and glutamate metabolism         | 84    | ko00250    | Metabolism | Amino acid metabolism                       |
| Tyrosine metabolism                                 | 57    | ko00350    | Metabolism | Amino acid metabolism                       |
| Histidine metabolism                                | 47    | ko00340    | Metabolism | Amino acid metabolism                       |
| Phenylalanine metabolism                            | 34    | ko00360    | Metabolism | Amino acid metabolism                       |
| Phenylalanine, tyrosine and tryptophan biosynthesis | 16    | ko00400    | Metabolism | Amino acid metabolism                       |
| Valine, leucine and isoleucine biosynthesis         | 5     | ko00290    | Metabolism | Amino acid metabolism                       |
| Lysine biosynthesis                                 | 4     | ko00300    | Metabolism | Amino acid metabolism                       |
| Butirosin and neomycin biosynthesis                 | 10    | ko00524    | Metabolism | Biosynthesis of other secondary metabolites |

|                                             |      |         |                |                                             |
|---------------------------------------------|------|---------|----------------|---------------------------------------------|
| Caffeine metabolism                         | 8    | ko00232 | Metabolism     | Biosynthesis of other secondary metabolites |
| Pathways in cancer                          | 1127 | ko05200 | Human Diseases | Cancers: Overview                           |
| Transcriptional misregulation in cancer     | 585  | ko05202 | Human Diseases | Cancers: Overview                           |
| Prostate cancer                             | 319  | ko05215 | Human Diseases | Cancers: Specific types                     |
| Small cell lung cancer                      | 255  | ko05222 | Human Diseases | Cancers: Specific types                     |
| Renal cell carcinoma                        | 241  | ko05211 | Human Diseases | Cancers: Specific types                     |
| Chronic myeloid leukemia                    | 234  | ko05220 | Human Diseases | Cancers: Specific types                     |
| Colorectal cancer                           | 231  | ko05210 | Human Diseases | Cancers: Specific types                     |
| Glioma                                      | 226  | ko05214 | Human Diseases | Cancers: Specific types                     |
| Basal cell carcinoma                        | 225  | ko05217 | Human Diseases | Cancers: Specific types                     |
| Pancreatic cancer                           | 202  | ko05212 | Human Diseases | Cancers: Specific types                     |
| Endometrial cancer                          | 195  | ko05213 | Human Diseases | Cancers: Specific types                     |
| Non-small cell lung cancer                  | 158  | ko05223 | Human Diseases | Cancers: Specific types                     |
| Melanoma                                    | 152  | ko05218 | Human Diseases | Cancers: Specific types                     |
| Acute myeloid leukemia                      | 152  | ko05221 | Human Diseases | Cancers: Specific types                     |
| Thyroid cancer                              | 124  | ko05216 | Human Diseases | Cancers: Specific types                     |
| Bladder cancer                              | 116  | ko05219 | Human Diseases | Cancers: Specific types                     |
| Amino sugar and nucleotide sugar metabolism | 309  | ko00520 | Metabolism     | Carbohydrate metabolism                     |
| Starch and sucrose metabolism               | 239  | ko00500 | Metabolism     | Carbohydrate metabolism                     |
| Glycolysis / Gluconeogenesis                | 211  | ko00010 | Metabolism     | Carbohydrate metabolism                     |
| Fructose and mannose metabolism             | 202  | ko00051 | Metabolism     | Carbohydrate metabolism                     |

|                                                        |     |         |                    |                         |
|--------------------------------------------------------|-----|---------|--------------------|-------------------------|
| Inositol phosphate metabolism                          | 184 | ko00562 | Metabolism         | Carbohydrate metabolism |
| Pentose and glucuronate interconversions               | 176 | ko00040 | Metabolism         | Carbohydrate metabolism |
| Ascorbate and aldarate metabolism                      | 146 | ko00053 | Metabolism         | Carbohydrate metabolism |
| Pyruvate metabolism                                    | 125 | ko00620 | Metabolism         | Carbohydrate metabolism |
| Galactose metabolism                                   | 103 | ko00052 | Metabolism         | Carbohydrate metabolism |
| Propanoate metabolism                                  | 92  | ko00640 | Metabolism         | Carbohydrate metabolism |
| Pentose phosphate pathway                              | 91  | ko00030 | Metabolism         | Carbohydrate metabolism |
| Citrate cycle (TCA cycle)                              | 91  | ko00020 | Metabolism         | Carbohydrate metabolism |
| Glyoxylate and dicarboxylate metabolism                | 77  | ko00630 | Metabolism         | Carbohydrate metabolism |
| Butanoate metabolism                                   | 73  | ko00650 | Metabolism         | Carbohydrate metabolism |
| Dilated cardiomyopathy                                 | 848 | ko05414 | Human Diseases     | Cardiovascular diseases |
| Hypertrophic cardiomyopathy (HCM)                      | 777 | ko05410 | Human Diseases     | Cardiovascular diseases |
| Viral myocarditis                                      | 651 | ko05416 | Human Diseases     | Cardiovascular diseases |
| Arrhythmogenic right ventricular cardiomyopathy (ARVC) | 408 | ko05412 | Human Diseases     | Cardiovascular diseases |
| Focal adhesion                                         | 927 | ko04510 | Cellular Processes | Cell communication      |
| Tight junction                                         | 843 | ko04530 | Cellular Processes | Cell communication      |
| Adherens junction                                      | 521 | ko04520 | Cellular Processes | Cell communication      |
| Gap junction                                           | 245 | ko04540 | Cellular Processes | Cell communication      |
| Cell cycle                                             | 314 | ko04110 | Cellular Processes | Cell growth and death   |
| Oocyte meiosis                                         | 287 | ko04114 | Cellular Processes | Cell growth and death   |

|                                       |      |         |                    |                                  |
|---------------------------------------|------|---------|--------------------|----------------------------------|
| p53 signaling pathway                 | 219  | ko04115 | Cellular Processes | Cell growth and death            |
| Apoptosis                             | 210  | ko04210 | Cellular Processes | Cell growth and death            |
| Regulation of actin cytoskeleton      | 1210 | ko04810 | Cellular Processes | Cell motility                    |
| Vascular smooth muscle contraction    | 721  | ko04270 | Organismal Systems | Circulatory system               |
| Cardiac muscle contraction            | 707  | ko04260 | Organismal Systems | Circulatory system               |
| Axon guidance                         | 530  | ko04360 | Organismal Systems | Development                      |
| Osteoclast differentiation            | 431  | ko04380 | Organismal Systems | Development                      |
| Dorso-ventral axis formation          | 122  | ko04320 | Organismal Systems | Development                      |
| Bile secretion                        | 393  | ko04976 | Organismal Systems | Digestive system                 |
| Gastric acid secretion                | 392  | ko04971 | Organismal Systems | Digestive system                 |
| Pancreatic secretion                  | 384  | ko04972 | Organismal Systems | Digestive system                 |
| Salivary secretion                    | 362  | ko04970 | Organismal Systems | Digestive system                 |
| Protein digestion and absorption      | 334  | ko04974 | Organismal Systems | Digestive system                 |
| Mineral absorption                    | 262  | ko04978 | Organismal Systems | Digestive system                 |
| Carbohydrate digestion and absorption | 210  | ko04973 | Organismal Systems | Digestive system                 |
| Fat digestion and absorption          | 120  | ko04975 | Organismal Systems | Digestive system                 |
| Vitamin digestion and absorption      | 83   | ko04977 | Organismal Systems | Digestive system                 |
| Type II diabetes mellitus             | 176  | ko04930 | Human Diseases     | Endocrine and metabolic diseases |
| Type I diabetes mellitus              | 147  | ko04940 | Human Diseases     | Endocrine and metabolic diseases |
| Maturity onset diabetes of the young  | 47   | ko04950 | Human Diseases     | Endocrine and metabolic diseases |
| Insulin signaling pathway             | 464  | ko04910 | Organismal Systems | Endocrine system                 |



|                                                           |     |         |                                      |                                  |
|-----------------------------------------------------------|-----|---------|--------------------------------------|----------------------------------|
| PPAR signaling pathway                                    | 305 | ko03320 | Organismal Systems                   | Endocrine system                 |
| GnRH signaling pathway                                    | 295 | ko04912 | Organismal Systems                   | Endocrine system                 |
| Melanogenesis                                             | 268 | ko04916 | Organismal Systems                   | Endocrine system                 |
| Progesterone-mediated oocyte maturation                   | 236 | ko04914 | Organismal Systems                   | Endocrine system                 |
| Adipocytokine signaling pathway                           | 222 | ko04920 | Organismal Systems                   | Endocrine system                 |
| Renin-angiotensin system                                  | 29  | ko04614 | Organismal Systems                   | Endocrine system                 |
| Oxidative phosphorylation                                 | 355 | ko00190 | Metabolism                           | Energy metabolism                |
| Sulfur metabolism                                         | 21  | ko00920 | Metabolism                           | Energy metabolism                |
| Circadian rhythm - mammal                                 | 67  | ko04710 | Organismal Systems                   | Environmental adaptation         |
| Circadian rhythm - fly                                    | 38  | ko04711 | Organismal Systems                   | Environmental adaptation         |
| Endocrine and other factor-regulated calcium reabsorption | 240 | ko04961 | Organismal Systems                   | Excretory system                 |
| Vasopressin-regulated water reabsorption                  | 194 | ko04962 | Organismal Systems                   | Excretory system                 |
| Aldosterone-regulated sodium reabsorption                 | 189 | ko04960 | Organismal Systems                   | Excretory system                 |
| Proximal tubule bicarbonate reclamation                   | 150 | ko04964 | Organismal Systems                   | Excretory system                 |
| Collecting duct acid secretion                            | 80  | ko04966 | Organismal Systems                   | Excretory system                 |
| Protein processing in endoplasmic reticulum               | 539 | ko04141 | Genetic<br>Information<br>Processing | Folding, sorting and degradation |
| Ubiquitin mediated proteolysis                            | 455 | ko04120 | Genetic<br>Information<br>Processing | Folding, sorting and degradation |
| RNA degradation                                           | 199 | ko03018 | Genetic<br>Information               | Folding, sorting and degradation |

|                                                       |      |         |                                      |                                    |
|-------------------------------------------------------|------|---------|--------------------------------------|------------------------------------|
|                                                       |      |         | Processing                           |                                    |
| Proteasome                                            | 125  | ko03050 | Genetic<br>Information<br>Processing | Folding, sorting and degradation   |
| SNARE interactions in vesicular transport             | 59   | ko04130 | Genetic<br>Information<br>Processing | Folding, sorting and degradation   |
| Protein export                                        | 39   | ko03060 | Genetic<br>Information<br>Processing | Folding, sorting and degradation   |
| Sulfur relay system                                   | 18   | ko04122 | Genetic<br>Information<br>Processing | Folding, sorting and degradation   |
| Metabolic pathways                                    | 2880 | ko01100 | Metabolism                           | Global map                         |
| Other types of O-glycan biosynthesis                  | 104  | ko00514 | Metabolism                           | Glycan biosynthesis and metabolism |
| N-Glycan biosynthesis                                 | 79   | ko00510 | Metabolism                           | Glycan biosynthesis and metabolism |
| Glycosaminoglycan biosynthesis - heparan sulfate      | 73   | ko00534 | Metabolism                           | Glycan biosynthesis and metabolism |
| Mucin type O-Glycan biosynthesis                      | 38   | ko00512 | Metabolism                           | Glycan biosynthesis and metabolism |
| Other glycan degradation                              | 38   | ko00511 | Metabolism                           | Glycan biosynthesis and metabolism |
| Glycosylphosphatidylinositol(GPI)-anchor biosynthesis | 37   | ko00563 | Metabolism                           | Glycan biosynthesis and metabolism |
| Glycosphingolipid biosynthesis - ganglio series       | 32   | ko00604 | Metabolism                           | Glycan biosynthesis and metabolism |
| Glycosaminoglycan degradation                         | 31   | ko00531 | Metabolism                           | Glycan biosynthesis and metabolism |
| Glycosaminoglycan biosynthesis - chondroitin sulfate  | 30   | ko00532 | Metabolism                           | Glycan biosynthesis and metabolism |

|                                                            |     |         |                    |                                    |
|------------------------------------------------------------|-----|---------|--------------------|------------------------------------|
| Glycosaminoglycan biosynthesis - keratan sulfate           | 28  | ko00533 | Metabolism         | Glycan biosynthesis and metabolism |
| Glycosphingolipid biosynthesis - lacto and neolacto series | 26  | ko00601 | Metabolism         | Glycan biosynthesis and metabolism |
| Glycosphingolipid biosynthesis - globo series              | 19  | ko00603 | Metabolism         | Glycan biosynthesis and metabolism |
| Systemic lupus erythematosus                               | 404 | ko05322 | Human Diseases     | Immune diseases                    |
| Rheumatoid arthritis                                       | 269 | ko05323 | Human Diseases     | Immune diseases                    |
| Primary immunodeficiency                                   | 244 | ko05340 | Human Diseases     | Immune diseases                    |
| Autoimmune thyroid disease                                 | 199 | ko05320 | Human Diseases     | Immune diseases                    |
| Allograft rejection                                        | 193 | ko05330 | Human Diseases     | Immune diseases                    |
| Asthma                                                     | 143 | ko05310 | Human Diseases     | Immune diseases                    |
| Graft-versus-host disease                                  | 134 | ko05332 | Human Diseases     | Immune diseases                    |
| NOD-like receptor signaling pathway                        | 585 | ko04621 | Organismal Systems | Immune system                      |
| Leukocyte transendothelial migration                       | 566 | ko04670 | Organismal Systems | Immune system                      |
| Chemokine signaling pathway                                | 522 | ko04062 | Organismal Systems | Immune system                      |
| Complement and coagulation cascades                        | 509 | ko04610 | Organismal Systems | Immune system                      |
| Fc gamma R-mediated phagocytosis                           | 496 | ko04666 | Organismal Systems | Immune system                      |
| Natural killer cell mediated cytotoxicity                  | 400 | ko04650 | Organismal Systems | Immune system                      |
| T cell receptor signaling pathway                          | 400 | ko04660 | Organismal Systems | Immune system                      |
| B cell receptor signaling pathway                          | 398 | ko04662 | Organismal Systems | Immune system                      |
| Hematopoietic cell lineage                                 | 371 | ko04640 | Organismal Systems | Immune system                      |

|                                                            |     |         |                    |                                |
|------------------------------------------------------------|-----|---------|--------------------|--------------------------------|
| Antigen processing and presentation                        | 318 | ko04612 | Organismal Systems | Immune system                  |
| Fc epsilon RI signaling pathway                            | 285 | ko04664 | Organismal Systems | Immune system                  |
| Toll-like receptor signaling pathway                       | 218 | ko04620 | Organismal Systems | Immune system                  |
| RIG-I-like receptor signaling pathway                      | 218 | ko04622 | Organismal Systems | Immune system                  |
| Intestinal immune network for IgA production               | 166 | ko04672 | Organismal Systems | Immune system                  |
| Cytosolic DNA-sensing pathway                              | 102 | ko04623 | Organismal Systems | Immune system                  |
| Tuberculosis                                               | 855 | ko05152 | Human Diseases     | Infectious diseases: Bacterial |
| Pertussis                                                  | 754 | ko05133 | Human Diseases     | Infectious diseases: Bacterial |
| Salmonella infection                                       | 622 | ko05132 | Human Diseases     | Infectious diseases: Bacterial |
| Pathogenic Escherichia coli infection                      | 539 | ko05130 | Human Diseases     | Infectious diseases: Bacterial |
| Vibrio cholerae infection                                  | 439 | ko05110 | Human Diseases     | Infectious diseases: Bacterial |
| Shigellosis                                                | 434 | ko05131 | Human Diseases     | Infectious diseases: Bacterial |
| Bacterial invasion of epithelial cells                     | 422 | ko05100 | Human Diseases     | Infectious diseases: Bacterial |
| Staphylococcus aureus infection                            | 413 | ko05150 | Human Diseases     | Infectious diseases: Bacterial |
| Legionellosis                                              | 298 | ko05134 | Human Diseases     | Infectious diseases: Bacterial |
| Epithelial cell signaling in Helicobacter pylori infection | 192 | ko05120 | Human Diseases     | Infectious diseases: Bacterial |
| Amoebiasis                                                 | 586 | ko05146 | Human Diseases     | Infectious diseases: Parasitic |
| Toxoplasmosis                                              | 424 | ko05145 | Human Diseases     | Infectious diseases: Parasitic |
| Leishmaniasis                                              | 381 | ko05140 | Human Diseases     | Infectious diseases: Parasitic |
| Chagas disease (American trypanosomiasis)                  | 362 | ko05142 | Human Diseases     | Infectious diseases: Parasitic |

|                                         |      |         |                |                                |
|-----------------------------------------|------|---------|----------------|--------------------------------|
| African trypanosomiasis                 | 150  | ko05143 | Human Diseases | Infectious diseases: Parasitic |
| Malaria                                 | 129  | ko05144 | Human Diseases | Infectious diseases: Parasitic |
| Influenza A                             | 1092 | ko05164 | Human Diseases | Infectious diseases: Viral     |
| Epstein-Barr virus infection            | 817  | ko05169 | Human Diseases | Infectious diseases: Viral     |
| HTLV-I infection                        | 803  | ko05166 | Human Diseases | Infectious diseases: Viral     |
| Herpes simplex infection                | 732  | ko05168 | Human Diseases | Infectious diseases: Viral     |
| Measles                                 | 397  | ko05162 | Human Diseases | Infectious diseases: Viral     |
| Hepatitis C                             | 368  | ko05160 | Human Diseases | Infectious diseases: Viral     |
| Glycerophospholipid metabolism          | 167  | ko00564 | Metabolism     | Lipid metabolism               |
| Arachidonic acid metabolism             | 125  | ko00590 | Metabolism     | Lipid metabolism               |
| Steroid hormone biosynthesis            | 124  | ko00140 | Metabolism     | Lipid metabolism               |
| Fatty acid metabolism                   | 107  | ko00071 | Metabolism     | Lipid metabolism               |
| Glycerolipid metabolism                 | 101  | ko00561 | Metabolism     | Lipid metabolism               |
| Linoleic acid metabolism                | 93   | ko00591 | Metabolism     | Lipid metabolism               |
| Sphingolipid metabolism                 | 93   | ko00600 | Metabolism     | Lipid metabolism               |
| Ether lipid metabolism                  | 84   | ko00565 | Metabolism     | Lipid metabolism               |
| Fatty acid elongation                   | 56   | ko00062 | Metabolism     | Lipid metabolism               |
| Primary bile acid biosynthesis          | 53   | ko00120 | Metabolism     | Lipid metabolism               |
| Biosynthesis of unsaturated fatty acids | 52   | ko01040 | Metabolism     | Lipid metabolism               |
| alpha-Linolenic acid metabolism         | 42   | ko00592 | Metabolism     | Lipid metabolism               |
| Steroid biosynthesis                    | 27   | ko00100 | Metabolism     | Lipid metabolism               |

|                                                     |     |         |                                         |                                      |
|-----------------------------------------------------|-----|---------|-----------------------------------------|--------------------------------------|
| Synthesis and degradation of ketone bodies          | 23  | ko00072 | Metabolism                              | Lipid metabolism                     |
| Fatty acid biosynthesis                             | 15  | ko00061 | Metabolism                              | Lipid metabolism                     |
| ABC transporters                                    | 174 | ko02010 | Environmental<br>Information Processing | Membrane transport                   |
| Retinol metabolism                                  | 144 | ko00830 | Metabolism                              | Metabolism of cofactors and vitamins |
| Porphyrin and chlorophyll metabolism                | 126 | ko00860 | Metabolism                              | Metabolism of cofactors and vitamins |
| Nicotinate and nicotinamide metabolism              | 112 | ko00760 | Metabolism                              | Metabolism of cofactors and vitamins |
| One carbon pool by folate                           | 29  | ko00670 | Metabolism                              | Metabolism of cofactors and vitamins |
| Pantothenate and CoA biosynthesis                   | 22  | ko00770 | Metabolism                              | Metabolism of cofactors and vitamins |
| Folate biosynthesis                                 | 20  | ko00790 | Metabolism                              | Metabolism of cofactors and vitamins |
| Riboflavin metabolism                               | 19  | ko00740 | Metabolism                              | Metabolism of cofactors and vitamins |
| Ubiquinone and other terpenoid-quinone biosynthesis | 17  | ko00130 | Metabolism                              | Metabolism of cofactors and vitamins |
| Vitamin B6 metabolism                               | 14  | ko00750 | Metabolism                              | Metabolism of cofactors and vitamins |
| Lipoic acid metabolism                              | 7   | ko00785 | Metabolism                              | Metabolism of cofactors and vitamins |
| Thiamine metabolism                                 | 7   | ko00730 | Metabolism                              | Metabolism of cofactors and vitamins |
| Biotin metabolism                                   | 2   | ko00780 | Metabolism                              | Metabolism of cofactors and vitamins |
| Glutathione metabolism                              | 108 | ko00480 | Metabolism                              | Metabolism of other amino acids      |
| beta-Alanine metabolism                             | 64  | ko00410 | Metabolism                              | Metabolism of other amino acids      |
| Selenocompound metabolism                           | 38  | ko00450 | Metabolism                              | Metabolism of other amino acids      |
| Taurine and hypotaurine metabolism                  | 17  | ko00430 | Metabolism                              | Metabolism of other amino acids      |
| D-Glutamine and D-glutamate metabolism              | 15  | ko00471 | Metabolism                              | Metabolism of other amino acids      |

|                                       |     |         |                    |                                          |
|---------------------------------------|-----|---------|--------------------|------------------------------------------|
| Cyanoamino acid metabolism            | 10  | ko00460 | Metabolism         | Metabolism of other amino acids          |
| D-Arginine and D-ornithine metabolism | 8   | ko00472 | Metabolism         | Metabolism of other amino acids          |
| Terpenoid backbone biosynthesis       | 26  | ko00900 | Metabolism         | Metabolism of terpenoids and polyketides |
| Insect hormone biosynthesis           | 2   | ko00981 | Metabolism         | Metabolism of terpenoids and polyketides |
| Polyketide sugar unit biosynthesis    | 2   | ko00523 | Metabolism         | Metabolism of terpenoids and polyketides |
| Dopaminergic synapse                  | 466 | ko04728 | Organismal Systems | Nervous system                           |
| Neurotrophin signaling pathway        | 394 | ko04722 | Organismal Systems | Nervous system                           |
| Glutamatergic synapse                 | 351 | ko04724 | Organismal Systems | Nervous system                           |
| Serotonergic synapse                  | 322 | ko04726 | Organismal Systems | Nervous system                           |
| Cholinergic synapse                   | 320 | ko04725 | Organismal Systems | Nervous system                           |
| Retrograde endocannabinoid signaling  | 301 | ko04723 | Organismal Systems | Nervous system                           |
| Long-term potentiation                | 296 | ko04720 | Organismal Systems | Nervous system                           |
| GABAergic synapse                     | 283 | ko04727 | Organismal Systems | Nervous system                           |
| Synaptic vesicle cycle                | 236 | ko04721 | Organismal Systems | Nervous system                           |
| Long-term depression                  | 202 | ko04730 | Organismal Systems | Nervous system                           |
| Huntington's disease                  | 711 | ko05016 | Human Diseases     | Neurodegenerative diseases               |
| Alzheimer's disease                   | 618 | ko05010 | Human Diseases     | Neurodegenerative diseases               |
| Parkinson's disease                   | 390 | ko05012 | Human Diseases     | Neurodegenerative diseases               |
| Amyotrophic lateral sclerosis (ALS)   | 274 | ko05014 | Human Diseases     | Neurodegenerative diseases               |
| Prion diseases                        | 166 | ko05020 | Human Diseases     | Neurodegenerative diseases               |
| Purine metabolism                     | 643 | ko00230 | Metabolism         | Nucleotide metabolism                    |

|                            |     |         |                                      |                        |
|----------------------------|-----|---------|--------------------------------------|------------------------|
| Pyrimidine metabolism      | 467 | ko00240 | Metabolism                           | Nucleotide metabolism  |
| Base excision repair       | 101 | ko03410 | Genetic<br>Information<br>Processing | Replication and repair |
| Nucleotide excision repair | 86  | ko03420 | Genetic<br>Information<br>Processing | Replication and repair |
| Fanconi anemia pathway     | 83  | ko03460 | Genetic<br>Information<br>Processing | Replication and repair |
| DNA replication            | 55  | ko03030 | Genetic<br>Information<br>Processing | Replication and repair |
| Homologous recombination   | 35  | ko03440 | Genetic<br>Information<br>Processing | Replication and repair |
| Mismatch repair            | 30  | ko03430 | Genetic<br>Information<br>Processing | Replication and repair |
| Non-homologous end-joining | 20  | ko03450 | Genetic<br>Information<br>Processing | Replication and repair |
| Olfactory transduction     | 176 | ko04740 | Organismal Systems                   | Sensory system         |
| Phototransduction - fly    | 163 | ko04745 | Organismal Systems                   | Sensory system         |
| Phototransduction          | 128 | ko04744 | Organismal Systems                   | Sensory system         |
| Taste transduction         | 87  | ko04742 | Organismal Systems                   | Sensory system         |



|                                       |     |         |                                         |                                     |
|---------------------------------------|-----|---------|-----------------------------------------|-------------------------------------|
| MAPK signaling pathway                | 798 | ko04010 | Environmental<br>Information Processing | Signal transduction                 |
| Calcium signaling pathway             | 629 | ko04020 | Environmental<br>Information Processing | Signal transduction                 |
| Wnt signaling pathway                 | 491 | ko04310 | Environmental<br>Information Processing | Signal transduction                 |
| NF-kappa B signaling pathway          | 427 | ko04064 | Environmental<br>Information Processing | Signal transduction                 |
| ErbB signaling pathway                | 263 | ko04012 | Environmental<br>Information Processing | Signal transduction                 |
| Phosphatidylinositol signaling system | 263 | ko04070 | Environmental<br>Information Processing | Signal transduction                 |
| Jak-STAT signaling pathway            | 262 | ko04630 | Environmental<br>Information Processing | Signal transduction                 |
| VEGF signaling pathway                | 258 | ko04370 | Environmental<br>Information Processing | Signal transduction                 |
| TGF-beta signaling pathway            | 237 | ko04350 | Environmental<br>Information Processing | Signal transduction                 |
| Notch signaling pathway               | 192 | ko04330 | Environmental<br>Information Processing | Signal transduction                 |
| Hedgehog signaling pathway            | 188 | ko04340 | Environmental<br>Information Processing | Signal transduction                 |
| mTOR signaling pathway                | 153 | ko04150 | Environmental<br>Information Processing | Signal transduction                 |
| MAPK signaling pathway - fly          | 62  | ko04013 | Environmental<br>Information Processing | Signal transduction                 |
| Cell adhesion molecules (CAMs)        | 575 | ko04514 | Environmental                           | Signaling molecules and interaction |

|                                         |     |         |                                         |                                     |
|-----------------------------------------|-----|---------|-----------------------------------------|-------------------------------------|
|                                         |     |         | Information Processing                  |                                     |
| Neuroactive ligand-receptor interaction | 486 | ko04080 | Environmental<br>Information Processing | Signaling molecules and interaction |
| ECM-receptor interaction                | 339 | ko04512 | Environmental<br>Information Processing | Signaling molecules and interaction |
| Cytokine-cytokine receptor interaction  | 331 | ko04060 | Environmental<br>Information Processing | Signaling molecules and interaction |
| Alcoholism                              | 343 | ko05034 | Human Diseases                          | Substance dependence                |
| Amphetamine addiction                   | 273 | ko05031 | Human Diseases                          | Substance dependence                |
| Morphine addiction                      | 238 | ko05032 | Human Diseases                          | Substance dependence                |
| Cocaine addiction                       | 158 | ko05030 | Human Diseases                          | Substance dependence                |
| Nicotine addiction                      | 115 | ko05033 | Human Diseases                          | Substance dependence                |
| Spliceosome                             | 534 | ko03040 | Genetic<br>Information<br>Processing    | Transcription                       |
| RNA polymerase                          | 298 | ko03020 | Genetic<br>Information<br>Processing    | Transcription                       |
| Basal transcription factors             | 86  | ko03022 | Genetic<br>Information<br>Processing    | Transcription                       |
| RNA transport                           | 638 | ko03013 | Genetic<br>Information<br>Processing    | Translation                         |
| Ribosome                                | 435 | ko03010 | Genetic                                 | Translation                         |

|                                              |     |         |                                |                                           |
|----------------------------------------------|-----|---------|--------------------------------|-------------------------------------------|
|                                              |     |         | Information Processing         |                                           |
| mRNA surveillance pathway                    | 319 | ko03015 | Genetic Information Processing | Translation                               |
| Ribosome biogenesis in eukaryotes            | 275 | ko03008 | Genetic Information Processing | Translation                               |
| Aminoacyl-tRNA biosynthesis                  | 90  | ko00970 | Genetic Information Processing | Translation                               |
| Phagosome                                    | 820 | ko04145 | Cellular Processes             | Transport and catabolism                  |
| Endocytosis                                  | 720 | ko04144 | Cellular Processes             | Transport and catabolism                  |
| Lysosome                                     | 399 | ko04142 | Cellular Processes             | Transport and catabolism                  |
| Peroxisome                                   | 187 | ko04146 | Cellular Processes             | Transport and catabolism                  |
| Regulation of autophagy                      | 41  | ko04140 | Cellular Processes             | Transport and catabolism                  |
| Metabolism of xenobiotics by cytochrome P450 | 158 | ko00980 | Metabolism                     | Xenobiotics biodegradation and metabolism |
| Drug metabolism - cytochrome P450            | 152 | ko00982 | Metabolism                     | Xenobiotics biodegradation and metabolism |
| Drug metabolism - other enzymes              | 114 | ko00983 | Metabolism                     | Xenobiotics biodegradation and metabolism |
